# Supplementary material for: Precise synthesis of schwarzite carbon: hypothesis or reality?
Source: Royal Society of Chemistry journal article supplement (doi:10.1039/d3qo00202k), 2023-01-01
Supplement: d3qo00202k1.pdf [file d3qo00202k1.pdf]

Supporting information for  
**Precise synthesis of schwarzites carbon:  
hypothesis or reality?**

Ming-Wei Wang, Zuoyu Li, Yujian Liu, Wei Jiang and Zhaohui Wang\*

Key Laboratory of Organic Optoelectronics and Molecular Engineering, Department of Chemistry,  
Tsinghua University, Beijing 100084, China

**Table of Contents**

|                                         |            |
|-----------------------------------------|------------|
| <b>1. Theoretical Calculations.....</b> | <b>S1</b>  |
| <b>2. Reference.....</b>                | <b>S12</b> |

**1. Theoretical Calculations**

The density functional theory (DFT) calculations were performed with the Gaussian 16 quantum chemistry package<sup>[1]</sup> employing the M06-2X<sup>[2]</sup> exchange-correlation functional and the def2-SVP<sup>[3]</sup> basis set. The optimized structures were confirmed by harmonic frequency calculations, and there was no imaginary frequency.

The simulated absorption spectrum for **P192** was calculated employing the time-dependent DFT (TDDFT) linear response method under M06-2X/def2-SVP level and the lowest 50 states were computed at the optimized geometry. The calculated line spectra are represented by applying Gaussian broadening with a full width at half maximum (FWHM) of 0.15 eV. The simulated UV-vis spectrum was generated by Multiwfn 3.8 dev<sup>[4]</sup>.

**Table S1.** Calculated photophysical property data of the ground state of **P192** at the M06-2X/def2-SVP level.

| Excited States           | Energy [eV] | Wavelength [nm] | Oscillator Strength | Transitions                                                                                                                                                           |
|--------------------------|-------------|-----------------|---------------------|-----------------------------------------------------------------------------------------------------------------------------------------------------------------------|
| $S_0 \rightarrow S_{18}$ |             |                 |                     | H-7 $\rightarrow$ L+1 20.5%, H-3 $\rightarrow$ L+4 16.6%, H-2 $\rightarrow$ L+2 16.6%, H-1 $\rightarrow$ L+7 8.7%, H $\rightarrow$ L+7 8.2%, H-7 $\rightarrow$ L 5.6% |
| $S_0 \rightarrow S_{19}$ | 2.9160      | 425             | 1.4459              | H-5 $\rightarrow$ L+1 18.6%, H-2 $\rightarrow$ L+3 16.6%, H-4 $\rightarrow$ L+4 16.6%, H-1 $\rightarrow$ L+6 15.7%, H-5 $\rightarrow$ L 7.5%                          |
| $S_0 \rightarrow S_{20}$ |             |                 |                     | H-6 $\rightarrow$ L 26.0%, H-3 $\rightarrow$ L+3 16.6%, H-4 $\rightarrow$ L+2 16.6%, H $\rightarrow$ L+5 15.9%                                                        |
| $S_0 \rightarrow S_{36}$ |             |                 |                     | H-3 $\rightarrow$ L+4 30.4%, H-2 $\rightarrow$ L+2 30.4%, H-7 $\rightarrow$ L+1 13.8%                                                                                 |
| $S_0 \rightarrow S_{37}$ | 3.2692      | 379             | 0.1022              | H-4 $\rightarrow$ L+4 30.4%, H-2 $\rightarrow$ L+3 30.4%, H-5 $\rightarrow$ L+1 12.5%, H-5 $\rightarrow$ L 5.0%                                                       |
| $S_0 \rightarrow S_{38}$ |             |                 |                     | H-4 $\rightarrow$ L+2 30.4%, H-3 $\rightarrow$ L+3 30.4%, H-6 $\rightarrow$ L 17.5%                                                                                   |

**Table S2.** Frontier molecular orbital energies (eV)

|             | $E_{LUMO}$<br>[eV] | $E_{HOMO}$<br>[eV] | H-L Gap<br>[eV] |
|-------------|--------------------|--------------------|-----------------|
| <b>P192</b> | -2.45              | -6.11              | 3.66            |
| <b>PL96</b> | -3.23              | -4.49              | 1.26            |

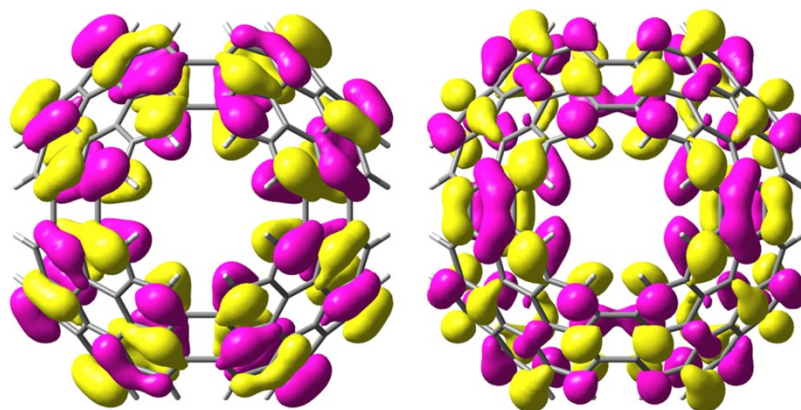

**Figure 1.** HOMO (left) and LUMO (right) orbital for **P192** (isovalue = 0.01).

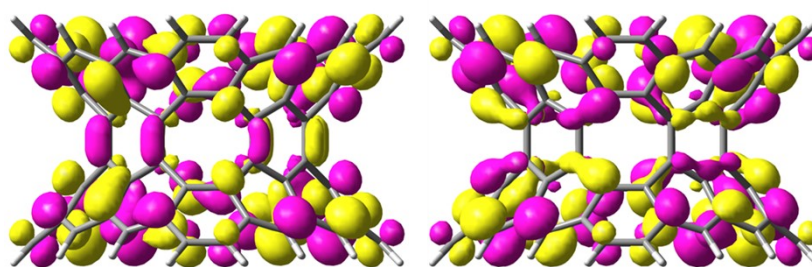

**Figure 2.** HOMO (left) and LUMO (right) orbital for **PL96** (isovalue = 0.02).

**Table S3.** The cartesian coordinates of optimized structures for **P192** and **PL96** are listed as follows:

**P192**

|   |             |            |            |
|---|-------------|------------|------------|
| C | 1.45051500  | 3.18094600 | 6.60395500 |
| C | 2.73219400  | 2.73219400 | 6.19300100 |
| C | 3.18094600  | 1.45051500 | 6.60395500 |
| C | 0.74358200  | 4.12418200 | 5.88676500 |
| C | 1.43351300  | 4.88006000 | 4.88006000 |
| C | 2.76380200  | 4.51971200 | 4.51971200 |
| C | 3.37870300  | 3.37870300 | 5.11841100 |
| C | 4.51971200  | 2.76380200 | 4.51971200 |
| C | 4.88006000  | 1.43351300 | 4.88006000 |
| C | 4.12418200  | 0.74358200 | 5.88676500 |
| C | -3.18094600 | 1.45051500 | 6.60395500 |
| C | -2.73219400 | 2.73219400 | 6.19300100 |
| C | -1.45051500 | 3.18094600 | 6.60395500 |
| C | -4.12418200 | 0.74358200 | 5.88676500 |
| C | -4.88006000 | 1.43351300 | 4.88006000 |
| C | -4.51971200 | 2.76380200 | 4.51971200 |
| C | -3.37870300 | 3.37870300 | 5.11841100 |
| C | -2.76380200 | 4.51971200 | 4.51971200 |
| C | -1.43351300 | 4.88006000 | 4.88006000 |

|   |             |             |             |
|---|-------------|-------------|-------------|
| C | -0.74358200 | 4.12418200  | 5.88676500  |
| C | -1.45051500 | -3.18094600 | 6.60395500  |
| C | -2.73219400 | -2.73219400 | 6.19300100  |
| C | -3.18094600 | -1.45051500 | 6.60395500  |
| C | -0.74358200 | -4.12418200 | 5.88676500  |
| C | -1.43351300 | -4.88006000 | 4.88006000  |
| C | -2.76380200 | -4.51971200 | 4.51971200  |
| C | -3.37870300 | -3.37870300 | 5.11841100  |
| C | -4.51971200 | -2.76380200 | 4.51971200  |
| C | -4.88006000 | -1.43351300 | 4.88006000  |
| C | -4.12418200 | -0.74358200 | 5.88676500  |
| C | 3.18094600  | -1.45051500 | 6.60395500  |
| C | 2.73219400  | -2.73219400 | 6.19300100  |
| C | 1.45051500  | -3.18094600 | 6.60395500  |
| C | 4.12418200  | -0.74358200 | 5.88676500  |
| C | 4.88006000  | -1.43351300 | 4.88006000  |
| C | 4.51971200  | -2.76380200 | 4.51971200  |
| C | 3.37870300  | -3.37870300 | 5.11841100  |
| C | 2.76380200  | -4.51971200 | 4.51971200  |
| C | 1.43351300  | -4.88006000 | 4.88006000  |
| C | 0.74358200  | -4.12418200 | 5.88676500  |
| C | -5.88676500 | 0.74358200  | 4.12418200  |
| C | -5.88676500 | -0.74358200 | 4.12418200  |
| C | 5.88676500  | 0.74358200  | 4.12418200  |
| C | 5.88676500  | -0.74358200 | 4.12418200  |
| C | 1.45051500  | 6.60395500  | -3.18094600 |
| C | 2.73219400  | 6.19300100  | -2.73219400 |
| C | 3.18094600  | 6.60395500  | -1.45051500 |
| C | 0.74358200  | 5.88676500  | -4.12418200 |
| C | 1.43351300  | 4.88006000  | -4.88006000 |
| C | 2.76380200  | 4.51971200  | -4.51971200 |
| C | 3.37870300  | 5.11841100  | -3.37870300 |
| C | 4.51971200  | 4.51971200  | -2.76380200 |
| C | 4.88006000  | 4.88006000  | -1.43351300 |
| C | 4.12418200  | 5.88676500  | -0.74358200 |
| C | -3.18094600 | 6.60395500  | -1.45051500 |
| C | -2.73219400 | 6.19300100  | -2.73219400 |
| C | -1.45051500 | 6.60395500  | -3.18094600 |
| C | -4.12418200 | 5.88676500  | -0.74358200 |
| C | -4.88006000 | 4.88006000  | -1.43351300 |
| C | -4.51971200 | 4.51971200  | -2.76380200 |
| C | -3.37870300 | 5.11841100  | -3.37870300 |
| C | -2.76380200 | 4.51971200  | -4.51971200 |
| C | -1.43351300 | 4.88006000  | -4.88006000 |

|   |             |             |             |
|---|-------------|-------------|-------------|
| C | -0.74358200 | 5.88676500  | -4.12418200 |
| C | -1.45051500 | 6.60395500  | 3.18094600  |
| C | -2.73219400 | 6.19300100  | 2.73219400  |
| C | -3.18094600 | 6.60395500  | 1.45051500  |
| C | -0.74358200 | 5.88676500  | 4.12418200  |
| C | -3.37870300 | 5.11841100  | 3.37870300  |
| C | -4.51971200 | 4.51971200  | 2.76380200  |
| C | -4.88006000 | 4.88006000  | 1.43351300  |
| C | -4.12418200 | 5.88676500  | 0.74358200  |
| C | 3.18094600  | 6.60395500  | 1.45051500  |
| C | 2.73219400  | 6.19300100  | 2.73219400  |
| C | 1.45051500  | 6.60395500  | 3.18094600  |
| C | 4.12418200  | 5.88676500  | 0.74358200  |
| C | 4.88006000  | 4.88006000  | 1.43351300  |
| C | 4.51971200  | 4.51971200  | 2.76380200  |
| C | 3.37870300  | 5.11841100  | 3.37870300  |
| C | 0.74358200  | 5.88676500  | 4.12418200  |
| C | -5.88676500 | 4.12418200  | -0.74358200 |
| C | -5.88676500 | 4.12418200  | 0.74358200  |
| C | 5.88676500  | 4.12418200  | -0.74358200 |
| C | 5.88676500  | 4.12418200  | 0.74358200  |
| C | 1.45051500  | -3.18094600 | -6.60395500 |
| C | 2.73219400  | -2.73219400 | -6.19300100 |
| C | 3.18094600  | -1.45051500 | -6.60395500 |
| C | 0.74358200  | -4.12418200 | -5.88676500 |
| C | 3.37870300  | -3.37870300 | -5.11841100 |
| C | 4.51971200  | -2.76380200 | -4.51971200 |
| C | 4.88006000  | -1.43351300 | -4.88006000 |
| C | 4.12418200  | -0.74358200 | -5.88676500 |
| C | -3.18094600 | -1.45051500 | -6.60395500 |
| C | -2.73219400 | -2.73219400 | -6.19300100 |
| C | -1.45051500 | -3.18094600 | -6.60395500 |
| C | -4.12418200 | -0.74358200 | -5.88676500 |
| C | -4.88006000 | -1.43351300 | -4.88006000 |
| C | -4.51971200 | -2.76380200 | -4.51971200 |
| C | -3.37870300 | -3.37870300 | -5.11841100 |
| C | -0.74358200 | -4.12418200 | -5.88676500 |
| C | -1.45051500 | 3.18094600  | -6.60395500 |
| C | -2.73219400 | 2.73219400  | -6.19300100 |
| C | -3.18094600 | 1.45051500  | -6.60395500 |
| C | -0.74358200 | 4.12418200  | -5.88676500 |
| C | -3.37870300 | 3.37870300  | -5.11841100 |
| C | -4.51971200 | 2.76380200  | -4.51971200 |
| C | -4.88006000 | 1.43351300  | -4.88006000 |

|   |             |             |             |
|---|-------------|-------------|-------------|
| C | -4.12418200 | 0.74358200  | -5.88676500 |
| C | 3.18094600  | 1.45051500  | -6.60395500 |
| C | 2.73219400  | 2.73219400  | -6.19300100 |
| C | 1.45051500  | 3.18094600  | -6.60395500 |
| C | 4.12418200  | 0.74358200  | -5.88676500 |
| C | 4.88006000  | 1.43351300  | -4.88006000 |
| C | 4.51971200  | 2.76380200  | -4.51971200 |
| C | 3.37870300  | 3.37870300  | -5.11841100 |
| C | 0.74358200  | 4.12418200  | -5.88676500 |
| C | -5.88676500 | -0.74358200 | -4.12418200 |
| C | -5.88676500 | 0.74358200  | -4.12418200 |
| C | 5.88676500  | -0.74358200 | -4.12418200 |
| C | 5.88676500  | 0.74358200  | -4.12418200 |
| C | 1.45051500  | -6.60395500 | 3.18094600  |
| C | 2.73219400  | -6.19300100 | 2.73219400  |
| C | 3.18094600  | -6.60395500 | 1.45051500  |
| C | 0.74358200  | -5.88676500 | 4.12418200  |
| C | 3.37870300  | -5.11841100 | 3.37870300  |
| C | 4.51971200  | -4.51971200 | 2.76380200  |
| C | 4.88006000  | -4.88006000 | 1.43351300  |
| C | 4.12418200  | -5.88676500 | 0.74358200  |
| C | -3.18094600 | -6.60395500 | 1.45051500  |
| C | -2.73219400 | -6.19300100 | 2.73219400  |
| C | -1.45051500 | -6.60395500 | 3.18094600  |
| C | -4.12418200 | -5.88676500 | 0.74358200  |
| C | -4.88006000 | -4.88006000 | 1.43351300  |
| C | -4.51971200 | -4.51971200 | 2.76380200  |
| C | -3.37870300 | -5.11841100 | 3.37870300  |
| C | -0.74358200 | -5.88676500 | 4.12418200  |
| C | -1.45051500 | -6.60395500 | -3.18094600 |
| C | -2.73219400 | -6.19300100 | -2.73219400 |
| C | -3.18094600 | -6.60395500 | -1.45051500 |
| C | -0.74358200 | -5.88676500 | -4.12418200 |
| C | -1.43351300 | -4.88006000 | -4.88006000 |
| C | -2.76380200 | -4.51971200 | -4.51971200 |
| C | -3.37870300 | -5.11841100 | -3.37870300 |
| C | -4.51971200 | -4.51971200 | -2.76380200 |
| C | -4.88006000 | -4.88006000 | -1.43351300 |
| C | -4.12418200 | -5.88676500 | -0.74358200 |
| C | 3.18094600  | -6.60395500 | -1.45051500 |
| C | 2.73219400  | -6.19300100 | -2.73219400 |
| C | 1.45051500  | -6.60395500 | -3.18094600 |
| C | 4.12418200  | -5.88676500 | -0.74358200 |
| C | 4.88006000  | -4.88006000 | -1.43351300 |

|   |             |             |             |
|---|-------------|-------------|-------------|
| C | 4.51971200  | -4.51971200 | -2.76380200 |
| C | 3.37870300  | -5.11841100 | -3.37870300 |
| C | 2.76380200  | -4.51971200 | -4.51971200 |
| C | 1.43351300  | -4.88006000 | -4.88006000 |
| C | 0.74358200  | -5.88676500 | -4.12418200 |
| C | -5.88676500 | -4.12418200 | 0.74358200  |
| C | -5.88676500 | -4.12418200 | -0.74358200 |
| C | 5.88676500  | -4.12418200 | 0.74358200  |
| C | 5.88676500  | -4.12418200 | -0.74358200 |
| C | -5.11841100 | -3.37870300 | -3.37870300 |
| C | -6.19300100 | -2.73219400 | -2.73219400 |
| C | -6.60395500 | -3.18094600 | -1.45051500 |
| C | -6.60395500 | -1.45051500 | -3.18094600 |
| C | 5.11841100  | -3.37870300 | -3.37870300 |
| C | 6.60395500  | -1.45051500 | -3.18094600 |
| C | 6.19300100  | -2.73219400 | -2.73219400 |
| C | 6.60395500  | -3.18094600 | -1.45051500 |
| C | -5.11841100 | 3.37870300  | -3.37870300 |
| C | -6.60395500 | 3.18094600  | -1.45051500 |
| C | -6.19300100 | 2.73219400  | -2.73219400 |
| C | -6.60395500 | 1.45051500  | -3.18094600 |
| C | 5.11841100  | 3.37870300  | -3.37870300 |
| C | 6.60395500  | 3.18094600  | -1.45051500 |
| C | 6.19300100  | 2.73219400  | -2.73219400 |
| C | 6.60395500  | 1.45051500  | -3.18094600 |
| C | -5.11841100 | -3.37870300 | 3.37870300  |
| C | -6.60395500 | -1.45051500 | 3.18094600  |
| C | -6.19300100 | -2.73219400 | 2.73219400  |
| C | -6.60395500 | -3.18094600 | 1.45051500  |
| C | 5.11841100  | -3.37870300 | 3.37870300  |
| C | 6.60395500  | -1.45051500 | 3.18094600  |
| C | 6.19300100  | -2.73219400 | 2.73219400  |
| C | 6.60395500  | -3.18094600 | 1.45051500  |
| C | -5.11841100 | 3.37870300  | 3.37870300  |
| C | -6.60395500 | 1.45051500  | 3.18094600  |
| C | -6.19300100 | 2.73219400  | 2.73219400  |
| C | -6.60395500 | 3.18094600  | 1.45051500  |
| C | 5.11841100  | 3.37870300  | 3.37870300  |
| C | 6.60395500  | 1.45051500  | 3.18094600  |
| C | 6.19300100  | 2.73219400  | 2.73219400  |
| C | 6.60395500  | 3.18094600  | 1.45051500  |
| H | 0.95755200  | 2.59628100  | 7.37955200  |
| H | 2.59628100  | 0.95755200  | 7.37955200  |
| H | -2.59628100 | 0.95755200  | 7.37955200  |

|   |             |             |             |
|---|-------------|-------------|-------------|
| H | -0.95755200 | 2.59628100  | 7.37955200  |
| H | -0.95755200 | -2.59628100 | 7.37955200  |
| H | -2.59628100 | -0.95755200 | 7.37955200  |
| H | 2.59628100  | -0.95755200 | 7.37955200  |
| H | 0.95755200  | -2.59628100 | 7.37955200  |
| H | 0.95755200  | 7.37955200  | -2.59628100 |
| H | 2.59628100  | 7.37955200  | -0.95755200 |
| H | -2.59628100 | 7.37955200  | -0.95755200 |
| H | -0.95755200 | 7.37955200  | -2.59628100 |
| H | -0.95755200 | 7.37955200  | 2.59628100  |
| H | -2.59628100 | 7.37955200  | 0.95755200  |
| H | 2.59628100  | 7.37955200  | 0.95755200  |
| H | 0.95755200  | 7.37955200  | 2.59628100  |
| H | 0.95755200  | -2.59628100 | -7.37955200 |
| H | 2.59628100  | -0.95755200 | -7.37955200 |
| H | -2.59628100 | -0.95755200 | -7.37955200 |
| H | -0.95755200 | -2.59628100 | -7.37955200 |
| H | -0.95755200 | 2.59628100  | -7.37955200 |
| H | -2.59628100 | 0.95755200  | -7.37955200 |
| H | 2.59628100  | 0.95755200  | -7.37955200 |
| H | 0.95755200  | 2.59628100  | -7.37955200 |
| H | 0.95755200  | -7.37955200 | 2.59628100  |
| H | 2.59628100  | -7.37955200 | 0.95755200  |
| H | -2.59628100 | -7.37955200 | 0.95755200  |
| H | -0.95755200 | -7.37955200 | 2.59628100  |
| H | -0.95755200 | -7.37955200 | -2.59628100 |
| H | -2.59628100 | -7.37955200 | -0.95755200 |
| H | 2.59628100  | -7.37955200 | -0.95755200 |
| H | 0.95755200  | -7.37955200 | -2.59628100 |
| H | -7.37955200 | -2.59628100 | -0.95755200 |
| H | -7.37955200 | -0.95755200 | -2.59628100 |
| H | 7.37955200  | -0.95755200 | -2.59628100 |
| H | 7.37955200  | -2.59628100 | -0.95755200 |
| H | -7.37955200 | 2.59628100  | -0.95755200 |
| H | -7.37955200 | 0.95755200  | -2.59628100 |
| H | 7.37955200  | 2.59628100  | -0.95755200 |
| H | 7.37955200  | 0.95755200  | -2.59628100 |
| H | -7.37955200 | -0.95755200 | 2.59628100  |
| H | -7.37955200 | -2.59628100 | 0.95755200  |
| H | 7.37955200  | -0.95755200 | 2.59628100  |
| H | 7.37955200  | -2.59628100 | 0.95755200  |
| H | -7.37955200 | 0.95755200  | 2.59628100  |
| H | -7.37955200 | 2.59628100  | 0.95755200  |
| H | 7.37955200  | 0.95755200  | 2.59628100  |



|             |             |             |             |
|-------------|-------------|-------------|-------------|
| H           | 7.37955200  | 2.59628100  | 0.95755200  |
| <b>PL96</b> |             |             |             |
| C           | 2.43017000  | 4.39522300  | 2.63019000  |
| C           | 2.43617000  | 3.41732800  | 1.56279400  |
| C           | 1.23643100  | 3.41803700  | 0.69830400  |
| C           | 0.00000000  | 3.70920000  | 1.34473300  |
| C           | 0.00000000  | 4.55000700  | 2.50509800  |
| C           | 1.23704100  | 4.98954500  | 3.02145100  |
| C           | -1.23643100 | 3.41803700  | 0.69830400  |
| C           | -2.43617000 | 3.41732800  | 1.56279400  |
| C           | -2.43017000 | 4.39522300  | 2.63019000  |
| C           | -1.23704100 | 4.98954500  | 3.02145100  |
| C           | 1.23643100  | 3.41803700  | -0.69830400 |
| C           | 0.00000000  | 3.70920000  | -1.34473300 |
| C           | -1.23643100 | 3.41803700  | -0.69830400 |
| C           | 2.43617000  | 3.41732800  | -1.56279400 |
| C           | 2.43017000  | 4.39522300  | -2.63019000 |
| C           | 1.23704100  | 4.98954500  | -3.02145100 |
| C           | 0.00000000  | 4.55000700  | -2.50509800 |
| C           | -1.23704100 | 4.98954500  | -3.02145100 |
| C           | -2.43017000 | 4.39522300  | -2.63019000 |
| C           | -2.43617000 | 3.41732800  | -1.56279400 |
| C           | -3.62743600 | 4.58687500  | 3.40068300  |
| C           | 3.62743600  | 4.58687500  | 3.40068300  |
| C           | 3.62743600  | 4.58687500  | -3.40068300 |
| C           | 3.62743600  | -4.58687500 | 3.40068300  |
| C           | 4.39522300  | -2.43017000 | 2.63019000  |
| C           | 3.41732800  | -2.43617000 | 1.56279400  |
| C           | 3.41803700  | -1.23643100 | 0.69830400  |
| C           | 3.70920000  | 0.00000000  | 1.34473300  |
| C           | 4.55000700  | 0.00000000  | 2.50509800  |
| C           | 4.98954500  | -1.23704100 | 3.02145100  |
| C           | 3.41803700  | 1.23643100  | 0.69830400  |
| C           | 3.41732800  | 2.43617000  | 1.56279400  |
| C           | 4.39522300  | 2.43017000  | 2.63019000  |
| C           | 4.98954500  | 1.23704100  | 3.02145100  |
| C           | 3.41803700  | -1.23643100 | -0.69830400 |
| C           | 3.70920000  | 0.00000000  | -1.34473300 |
| C           | 3.41803700  | 1.23643100  | -0.69830400 |
| C           | 3.41732800  | -2.43617000 | -1.56279400 |
| C           | 4.39522300  | -2.43017000 | -2.63019000 |
| C           | 4.98954500  | -1.23704100 | -3.02145100 |
| C           | 4.55000700  | 0.00000000  | -2.50509800 |
| C           | 4.98954500  | 1.23704100  | -3.02145100 |

|   |             |             |             |
|---|-------------|-------------|-------------|
| C | 4.39522300  | 2.43017000  | -2.63019000 |
| C | 3.41732800  | 2.43617000  | -1.56279400 |
| C | 4.58687500  | -3.62743600 | 3.40068300  |
| C | 4.58687500  | -3.62743600 | -3.40068300 |
| C | 4.58687500  | 3.62743600  | 3.40068300  |
| C | 4.58687500  | 3.62743600  | -3.40068300 |
| C | 1.23643100  | -3.41803700 | 0.69830400  |
| C | 2.43617000  | -3.41732800 | 1.56279400  |
| C | 2.43017000  | -4.39522300 | 2.63019000  |
| C | -1.23643100 | -3.41803700 | -0.69830400 |
| C | 0.00000000  | -3.70920000 | -1.34473300 |
| C | 1.23643100  | -3.41803700 | -0.69830400 |
| C | -1.23704100 | -4.98954500 | -3.02145100 |
| C | 0.00000000  | -4.55000700 | -2.50509800 |
| C | 1.23704100  | -4.98954500 | -3.02145100 |
| C | 2.43017000  | -4.39522300 | -2.63019000 |
| C | 2.43617000  | -3.41732800 | -1.56279400 |
| C | 3.62743600  | -4.58687500 | -3.40068300 |
| C | 0.00000000  | -3.70920000 | 1.34473300  |
| C | 0.00000000  | -4.55000700 | 2.50509800  |
| C | 1.23704100  | -4.98954500 | 3.02145100  |
| C | -2.43617000 | -3.41732800 | -1.56279400 |
| C | -2.43017000 | -4.39522300 | -2.63019000 |
| C | -3.62743600 | -4.58687500 | -3.40068300 |
| C | -3.62743600 | -4.58687500 | 3.40068300  |
| C | -2.43617000 | -3.41732800 | 1.56279400  |
| C | -1.23643100 | -3.41803700 | 0.69830400  |
| C | -1.23704100 | -4.98954500 | 3.02145100  |
| C | -2.43017000 | -4.39522300 | 2.63019000  |
| C | -3.62743600 | 4.58687500  | -3.40068300 |
| C | -3.41803700 | 1.23643100  | -0.69830400 |
| C | -3.41732800 | 2.43617000  | -1.56279400 |
| C | -4.39522300 | 2.43017000  | -2.63019000 |
| C | -4.58687500 | 3.62743600  | -3.40068300 |
| C | -4.39522300 | 2.43017000  | 2.63019000  |
| C | -3.41732800 | 2.43617000  | 1.56279400  |
| C | -3.41803700 | 1.23643100  | 0.69830400  |
| C | -3.70920000 | 0.00000000  | 1.34473300  |
| C | -4.55000700 | 0.00000000  | 2.50509800  |
| C | -4.98954500 | 1.23704100  | 3.02145100  |
| C | -3.41803700 | -1.23643100 | 0.69830400  |
| C | -4.98954500 | -1.23704100 | 3.02145100  |
| C | -3.70920000 | 0.00000000  | -1.34473300 |
| C | -3.41803700 | -1.23643100 | -0.69830400 |

|   |             |             |             |
|---|-------------|-------------|-------------|
| C | -4.98954500 | 1.23704100  | -3.02145100 |
| C | -4.55000700 | 0.00000000  | -2.50509800 |
| C | -4.98954500 | -1.23704100 | -3.02145100 |
| C | -4.39522300 | -2.43017000 | -2.63019000 |
| C | -3.41732800 | -2.43617000 | -1.56279400 |
| C | -4.58687500 | 3.62743600  | 3.40068300  |
| C | -4.58687500 | -3.62743600 | -3.40068300 |
| C | -4.58687500 | -3.62743600 | 3.40068300  |
| C | -4.39522300 | -2.43017000 | 2.63019000  |
| C | -3.41732800 | -2.43617000 | 1.56279400  |
| H | 1.24395200  | 5.71528500  | 3.83787200  |
| H | -1.24395200 | 5.71528500  | 3.83787200  |
| H | 1.24395200  | 5.71528500  | -3.83787200 |
| H | -1.24395200 | 5.71528500  | -3.83787200 |
| H | -3.68558300 | 5.44306500  | 4.07548500  |
| H | 3.68558300  | 5.44306500  | 4.07548500  |
| H | 3.68558300  | 5.44306500  | -4.07548500 |
| H | 3.68558300  | -5.44306500 | 4.07548500  |
| H | 5.71528500  | -1.24395200 | 3.83787200  |
| H | 5.71528500  | 1.24395200  | 3.83787200  |
| H | 5.71528500  | -1.24395200 | -3.83787200 |
| H | 5.71528500  | 1.24395200  | -3.83787200 |
| H | 5.44306500  | -3.68558300 | 4.07548500  |
| H | 5.44306500  | -3.68558300 | -4.07548500 |
| H | 5.44306500  | 3.68558300  | 4.07548500  |
| H | 5.44306500  | 3.68558300  | -4.07548500 |
| H | -1.24395200 | -5.71528500 | -3.83787200 |
| H | 1.24395200  | -5.71528500 | -3.83787200 |
| H | 3.68558300  | -5.44306500 | -4.07548500 |
| H | 1.24395200  | -5.71528500 | 3.83787200  |
| H | -3.68558300 | -5.44306500 | -4.07548500 |
| H | -3.68558300 | -5.44306500 | 4.07548500  |
| H | -1.24395200 | -5.71528500 | 3.83787200  |
| H | -3.68558300 | 5.44306500  | -4.07548500 |
| H | -5.44306500 | 3.68558300  | -4.07548500 |
| H | -5.71528500 | 1.24395200  | 3.83787200  |
| H | -5.71528500 | -1.24395200 | 3.83787200  |
| H | -5.71528500 | 1.24395200  | -3.83787200 |
| H | -5.71528500 | -1.24395200 | -3.83787200 |
| H | -5.44306500 | 3.68558300  | 4.07548500  |
| H | -5.44306500 | -3.68558300 | -4.07548500 |
| H | -5.44306500 | -3.68558300 | 4.07548500  |

## 2. References

- [1] Gaussian 16, Revision B.01, M. J. Frisch, G. W. Trucks, H. B. Schlegel, G. E. Scuseria, M. A. Robb, J. R. Cheeseman, G. Scalmani, V. Barone, G. A. Petersson, H. Nakatsuji, X. Li, M. Caricato, A. V. Marenich, J. Bloino, B. G. Janesko, R. Gomperts, B. Mennucci, H. P. Hratchian, J. V. Ortiz, A. F. Izmaylov, J. L. Sonnenberg, D. Williams-Young, F. Ding, F. Lipparini, F. Egidi, J. Goings, B. Peng, A. Petrone, T. Henderson, D. Ranasinghe, V. G. Zakrzewski, J. Gao, N. Rega, G. Zheng, W. Liang, M. Hada, M. Ehara, K. Toyota, R. Fukuda, J. Hasegawa, M. Ishida, T. Nakajima, Y. Honda, O. Kitao, H. Nakai, T. Vreven, K. Throssell, J. A. Montgomery, Jr., J. E. Peralta, F. Ogliaro, M. J. Bearpark, J. J. Heyd, E. N. Brothers, K. N. Kudin, V. N. Staroverov, T. A. Keith, R. Kobayashi, J. Normand, K. Raghavachari, A. P. Rendell, J. C. Burant, S. S. Iyengar, J. Tomasi, M. Cossi, J. M. Millam, M. Klene, C. Adamo, R. Cammi, J. W. Ochterski, R. L. Martin, K. Morokuma, O. Farkas, J. B. Foresman, and D. J. Fox, Gaussian, Inc., Wallingford CT, 2016.
- [2] Y. Zhao, D. G. Truhlar, The M06 suite of density functionals for main group thermochemistry, thermochemical kinetics, noncovalent interactions, excited states, and transition elements: two new functionals and systematic testing of four M06-class functionals and 12 other functionals, *Theor. Chem. Acc.*, **2008**, *120*, 215-241.
- [3] F. Weigend, R. Ahlrich, Balanced basis sets of split valence, triple zeta valence and quadruple zeta valence quality for H to Rn: Design and assessment of accuracy, *Phys. Chem. Chem. Phys.* **2005**, *7*, 3297-3305.
- [4] T. Lu, F. Chen, Multiwfn: A multifunctional wavefunction analyzer, *J. Comput. Chem.* **2012**, *33*, 580-592.
